# Supplementary material
Source: ML conference proceedings conference paper supplement (https://aclanthology.org/K19-2010)
Supplement: Attachment [file K19-2010.Attachment.zip]

# Supplementary Materials for CUHK at MRP 2019: Transition-Based Parser with Cross-Framework Variable-Arity Resolve Action

Sunny Lai<sup>1,4</sup>, Chun Hei Lo<sup>2</sup>, Kwong Sak Leung<sup>1,4</sup> and Yee Leung<sup>3,4</sup>

<sup>1</sup>Department of Computer Science and Engineering

<sup>2</sup>Department of Systems Engineering and Engineering

<sup>3</sup>Department of Geography and Resource Management

<sup>4</sup>Institute of Future Cities

The Chinese University of Hong Kong, Shatin, N.T., Hong Kong

{slai, ksleung}@cse.cuhk.edu.hk,

chlo@se.cuhk.edu.hk, yeeleung@cuhk.edu.hk

## Abstract

Supplemental material provides information about the hyperparameters used and the alignment rules for DM.

## 1 Hyperparameters

We use GloVe (Pennington et al., 2014) embedding with 100 dimensions. We set other features' embedding in the feature vector to be of dimension 50. The MLP components in both neural network architectures have two layers, one with sigmoid activation, and the other linear. RESOLVE prediction neural network's hidden layer is of 100 dimensions and the one for action type prediction neural network have 50 dimensions. LSTM layers used are bidirectional.

## 2 Alignment Rules for DM

We provide a detailed alignment rule pipeline for DM in figure 1.

## References

Jeffrey Pennington, Richard Socher, and Christopher Manning. 2014. Glove: Global vectors for word representation. In *Proceedings of the 2014 conference on empirical methods in natural language processing (EMNLP)*, pages 1532–1543.

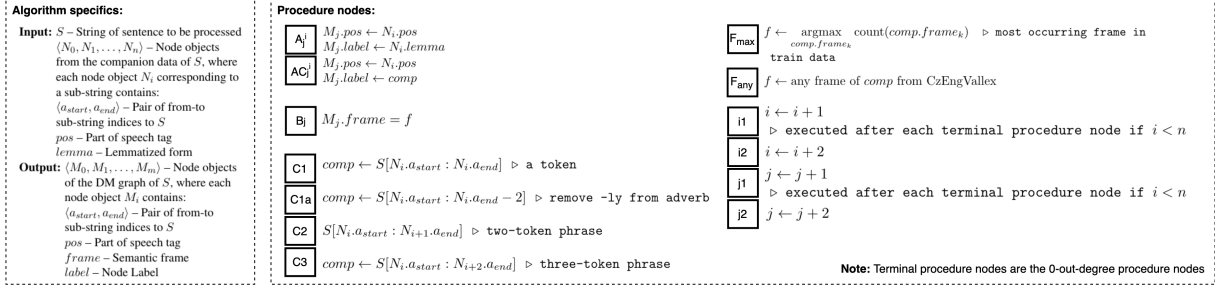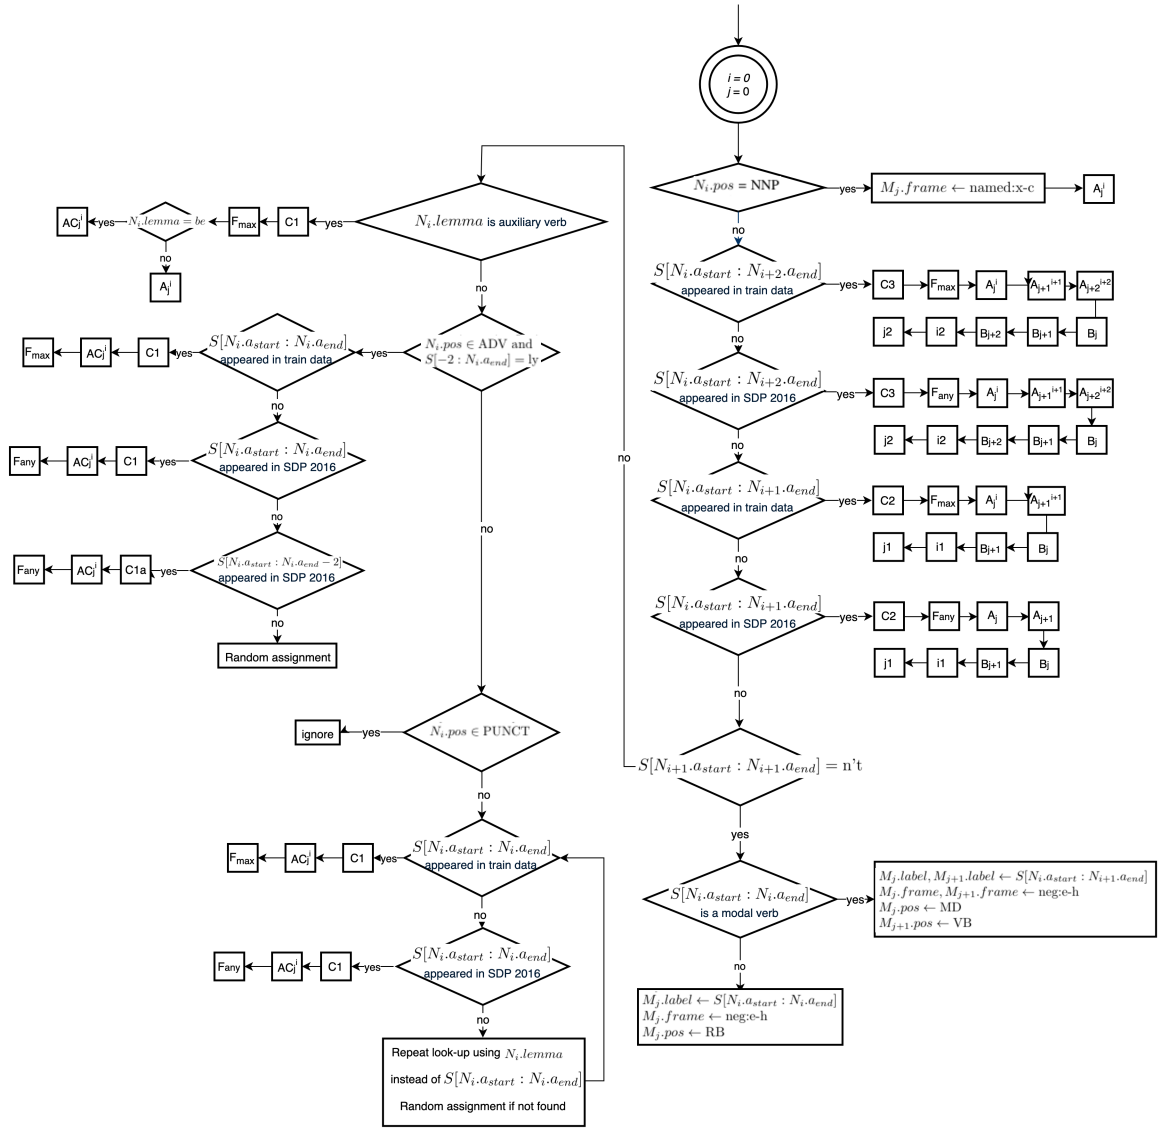

Figure 1: Alignment procedure for DM meaning representation.
