# Supplementary material
Source: ML conference proceedings conference paper supplement (https://aclanthology.org/K19-2010)
Supplement: Attachment [file K19-2010.Attachment.zip]

Archive with 2 entries (2 files):
- supp-submit-post1.pdf
- __MACOSX/._supp-submit-post1.pdf
